# Supplementary material for: An organophosphate 3d–4f heterometallic polyoxoniobate nanowire
Source: Royal Society of Chemistry journal article supplement (doi:10.1039/d4nr01619j), 2024-01-01
Supplement: d4nr01619j1.pdf [file d4nr01619j1.pdf]

## *Electronic supplementary information*

### **An organophosphate 3d-4f heterometallic polyoxoniobate nanowire**

*Jin-Ai Fan,<sup>†a</sup> Hao Yu,<sup>†a</sup> Yu-Diao Lin,<sup>a, b</sup> Ming-Qiang Qi,<sup>c</sup> Xiang-Jian Kong,<sup>c</sup> Cai Sun<sup>\*a</sup> and Shou-Tian Zheng<sup>\*a</sup>*

*<sup>a</sup> Fujian Provincial Key Laboratory of Advanced Inorganic Oxygenated Materials, College of Chemistry, Fuzhou University, Fuzhou, Fujian 350108, China*

*<sup>b</sup> Fujian Provincial Key Laboratory of Coastal Basin Environment, Fujian Polytechnic Normal University, Fuqing, Fujian 350300, China*

*<sup>c</sup> State Key Laboratory of Physical Chemistry of Solid Surface, College of Chemistry and Chemical Engineering, Xiamen University, Xiamen, 361005, China*

E-mail: csun@fzu.edu.cn; stzheng@fzu.edu.cn

*†These authors contributed equally to this work*

#### **This file includes:**

**Section S1** Experiment and methods

**Section S2** Additional tables

**Section S3** Additional characterizations and structural figures

## Section S1 Experiment and methods

All chemicals used for syntheses were purchased from commercial sources, and no further purifications were conducted before their usages.  $K_7\text{HfNb}_6\text{O}_{19}\cdot 13\text{H}_2\text{O}$  was prepared according to the literature procedure.<sup>1</sup> Infrared (IR) spectra (KBr pellet) were performed on an Opus Vetex 70 FTIR infrared spectrophotometer in the range of 400-4000  $\text{cm}^{-1}$ . Powder X-ray diffraction (PXRD) patterns were recorded on a Rigaku DMAX 2500 diffractometer with  $\text{Cu-K}\alpha$  radiation ( $\lambda = 1.54056 \text{ \AA}$ ). Thermogravimetric analysis was conducted using a Mettler Toledo TGA/SDTA 851e analyzer in an  $\text{N}_2$ -flow atmosphere with a heating rate of 10  $^\circ\text{C}/\text{min}$  at a temperature of 25-800  $^\circ\text{C}$ . The UV-vis spectra were measured on a SHIMADZU UV-2600 UV-visible spectrophotometer. Simulated XRD data was simulated by the Mercury Software with the step of  $0.02^\circ$  from  $5^\circ$  to  $50^\circ$  ( $\lambda = 1.54056 \text{ \AA}$ ). Variable temperature susceptibility measurements were carried out in the temperature range of 2-300 K at a magnetic field of 0.1 T on polycrystalline samples with a Quantum Design PPMS-9T magnetometer. The experimental susceptibilities were corrected for the Pascal's constants.

**Synthesis of 1:**  $K_7\text{HfNb}_6\text{O}_{19}\cdot 13\text{H}_2\text{O}$  (0.373 g, 0.27 mmol), cobalt acetylacetonate (0.085 g, 0.24 mmol),  $\text{Dy}(\text{Ac})_3\cdot 6\text{H}_2\text{O}$  (0.156 g, 0.35 mmol), and  $\text{NaHCO}_3$  (0.127 g, 1.51 mmol) were mixed in 7 mL  $\text{Na}_2\text{CO}_3/\text{NaHCO}_3$  buffer solution (0.05 M, pH = 11.5) and add 80  $\mu\text{L}$  EA (50% in water). to the mixture. Two minutes later, add 1 mL DMF, and after stirred 1 hour, the resulting mixture was sealed in a glass vial (20 ml) and heated at  $80^\circ\text{C}$  for 3 days. After cooling down, the filtrate was kept at room temperature for a week and pink block crystal of **1** suitable for X-ray diffraction experiments were obtained. Yield:  $\sim 30 \text{ mg}$  (8.1 %, based on  $K_7\text{HfNb}_6\text{O}_{19}\cdot 13\text{H}_2\text{O}$ ). The pH values before and after reaction were 8.7 and 8.1, respectively. ICP, calcd (found %): Dy 8.90 (8.70), Nb 40.72 (40.66), Co 0.81 (0.86).

**Synthetic discussion:** Three key synthetic strategies contribute to the successful syntheses of the novel organophosphate 3d-4f heterometallic polyoxoniobate. First of them is based on the consideration of charge matching of the components in the synthesised system. Both organophosphates and PONb clusters are electronegative ligands, the introduction of relatively high-valent  $\text{Ln}^{3+}$  cations as well as transition metal ions, which act both as charge compensators

and bridges between the remaining components, opens up the possibility of composite cluster formation. The second is the judicious use of  $\text{Na}_2\text{CO}_3$ - $\text{NaHCO}_3$  buffer solution, which not only can regulate the reaction alkalinity (suitable crystallisation environments for polyoxoniobate), but also exert a slow-releasing effect for  $\text{Ln}^{3+}$  ions via coordination (with  $\text{CO}_3^{2-}$  ligand) and thus avoid the rapid precipitation of  $\text{Ln}^{3+}$  ions under basic reaction conditions. The third is our selection of transition metal ion sources, initially, we attempted the use of metal chlorides, nitrates, and acetates corresponding to Co, Ni, Cu, Fe, and Mn (both divalent and trivalent ions). Unfortunately, the introduction of these metal ions into the system in the form of acidic salts leads to their immediate hydrolysis, resulting in the formation of large amounts of flocculated material or gels. In subsequent experimental designs, we used a synthetic strategy to achieve sustained release effect by coordination with metals. We chose acetylacetonate salt as the source of 3d metal ions and a mixed solvent thermal system of DMF/buffer. The hydrolysis of 3d metal ions was synergistically inhibited by the slow release of 3d metal ions from acetylacetonate salt itself in the synthesis system as well as the coordination slow-release effect of DMF solvent. Here we interestingly found that DMF ligands the slow release of metal ions in the hydrothermal system while using its own reducing properties to reduce our introduced cobalt (III) ions to cobalt (II) ions, further inhibiting the hydrolysis of transition metal ions, and finally 3d-4f heterometallic substituted inorganic-organic hybrid PONb were successfully synthesized.

**Single-crystal structure analysis:** The structure of **1** was determined at 150 K under nitrogen atmosphere by single-crystal X-ray diffraction method. The apparatus is a BrukerD8 Venture diffractometer and the X-ray resource is a graphite-monochromatized Mo  $K\alpha$  radiation with wavelength of 0.71073 Å. The structure of **1** was solved through direct methods and refined by full-matrix least-squares refinements based on  $F^2$  adopting the SHELXTL program package.<sup>2</sup> All non-H atoms were located with successive difference Fourier syntheses and refined anisotropically. The contribution of disordered solvent molecules to the overall intensity data of structures was treated using the SQUEEZE method in PLATON. Their crystallographic data can be queried with CCDC number of 2327331 at the Cambridge Crystallographic Data Centre.

## Section S2 Additional Tables

**Table S1** Crystal data and structure refinement for **1**

| Compounds <b>1</b>                                           |                                                                                                                                                   |
|--------------------------------------------------------------|---------------------------------------------------------------------------------------------------------------------------------------------------|
| Empirical formula                                            | H <sub>283</sub> K <sub>18</sub> Na <sub>5</sub> Co <sub>2</sub> C <sub>16</sub> P <sub>8</sub> Dy <sub>8</sub> Nb <sub>64</sub> O <sub>356</sub> |
| Formula weight                                               | 14603.5887                                                                                                                                        |
| Crystal system                                               | Triclinic                                                                                                                                         |
| Space group                                                  | <i>P</i> -1                                                                                                                                       |
| <i>a</i> (Å)                                                 | 20.5977(14)                                                                                                                                       |
| <i>b</i> (Å)                                                 | 21.1986(13)                                                                                                                                       |
| <i>c</i> (Å)                                                 | 25.5465(17)                                                                                                                                       |
| $\alpha$ (°)                                                 | 66.348(2)                                                                                                                                         |
| $\beta$ (°)                                                  | 88.655(2)                                                                                                                                         |
| $\gamma$ (°)                                                 | 87.214(2)                                                                                                                                         |
| <i>V</i> (Å <sup>3</sup> )                                   | 10205.5(12)                                                                                                                                       |
| <i>Z</i>                                                     | 1                                                                                                                                                 |
| <i>F</i> (000)                                               | 6395                                                                                                                                              |
| $\rho_{calc}$ (g/cm <sup>-3</sup> )                          | 2.241                                                                                                                                             |
| Temperature (K)                                              | 150(2)                                                                                                                                            |
| $\mu$ (mm <sup>-1</sup> )                                    | 3.560                                                                                                                                             |
| Reflections collected                                        | 391554                                                                                                                                            |
| Completeness                                                 | 98.1 %                                                                                                                                            |
| Data/restraints/parameters                                   | 36221/120/1995                                                                                                                                    |
| GOF on <i>F</i> <sup>2</sup>                                 | 1.045                                                                                                                                             |
| Final <i>R</i> indices [ <i>I</i> = 2 $\sigma$ ( <i>I</i> )] | <i>R</i> <sub>1</sub> = 0.0479, <i>wR</i> <sub>2</sub> = 0.1329                                                                                   |
| <i>R</i> indices (all data)                                  | <i>R</i> <sub>1</sub> = 0.0584, <i>wR</i> <sub>2</sub> = 0.1389                                                                                   |

$${}^a R_1 = \sum ||F_o| - |F_c|| / \sum |F_o|, {}^b wR_2 = \{ \sum \omega [(F_o)^2 - (F_c)^2]^2 / \sum \omega [(F_o)_2]^2 \}^{1/2}$$

**Table S2** BVS calculations of all the Co atoms for **1**.

| Atoms | Calcd for Co <sup>II</sup>  | Oxidation state  |
|-------|-----------------------------|------------------|
| Co1   | 2.07                        | Co <sup>II</sup> |
| Atoms | Calcd for Co <sup>III</sup> | Oxidation state  |
| Co1   | 1.76                        | Co <sup>II</sup> |

**Table S3** BVS calculations of all the Dy atoms for **1**.

| Atoms | Calcd for Dy <sup>III</sup> | Oxidation state   |
|-------|-----------------------------|-------------------|
| Dy1   | 3.14                        | Dy <sup>III</sup> |
| Dy2   | 3.21                        | Dy <sup>III</sup> |
| Dy3   | 3.12                        | Dy <sup>III</sup> |
| Dy4   | 3.19                        | Dy <sup>III</sup> |

**Table S4** BVS calculations of all the Nb atoms for **1**.

| Atoms | Calcd for Nb <sup>V</sup> | Oxidation state | Atoms | Calcd for Nb <sup>V</sup> | Oxidation state |
|-------|---------------------------|-----------------|-------|---------------------------|-----------------|
| Nb5   | 5.22                      | Nb <sup>V</sup> | Nb21  | 5.05                      | Nb <sup>V</sup> |
| Nb6   | 5.12                      | Nb <sup>V</sup> | Nb22  | 5.11                      | Nb <sup>V</sup> |
| Nb7   | 5.00                      | Nb <sup>V</sup> | Nb23  | 4.98                      | Nb <sup>V</sup> |
| Nb8   | 5.13                      | Nb <sup>V</sup> | Nb24  | 5.19                      | Nb <sup>V</sup> |
| Nb9   | 5.17                      | Nb <sup>V</sup> | Nb25  | 5.28                      | Nb <sup>V</sup> |
| Nb10  | 4.99                      | Nb <sup>V</sup> | Nb26  | 5.02                      | Nb <sup>V</sup> |
| Nb11  | 5.09                      | Nb <sup>V</sup> | Nb27  | 5.03                      | Nb <sup>V</sup> |
| Nb12  | 5.02                      | Nb <sup>V</sup> | Nb28  | 5.07                      | Nb <sup>V</sup> |
| Nb13  | 5.12                      | Nb <sup>V</sup> | Nb29  | 5.13                      | Nb <sup>V</sup> |
| Nb14  | 5.05                      | Nb <sup>V</sup> | Nb30  | 5.01                      | Nb <sup>V</sup> |
| Nb15  | 5.05                      | Nb <sup>V</sup> | Nb31  | 5.08                      | Nb <sup>V</sup> |
| Nb16  | 5.01                      | Nb <sup>V</sup> | Nb32  | 5.06                      | Nb <sup>V</sup> |
| Nb17  | 5.04                      | Nb <sup>V</sup> | Nb33  | 4.94                      | Nb <sup>V</sup> |
| Nb18  | 5.05                      | Nb <sup>V</sup> | Nb34  | 5.06                      | Nb <sup>V</sup> |
| Nb19  | 4.99                      | Nb <sup>V</sup> | Nb35  | 5.08                      | Nb <sup>V</sup> |
| Nb20  | 5.02                      | Nb <sup>V</sup> | Nb36  | 5.05                      | Nb <sup>V</sup> |

**Table S5** The calculation of the energy barrier  $U_{\text{eff}}$  of **1**

| Frequency (Hz) | Slope | $U_{\text{eff}}$ (K) |
|----------------|-------|----------------------|
| 311            | 0.999 | 0.999                |
| 511            | 0.876 | 0.876                |
| 711            | 0.791 | 0.791                |
| 911            | 0.729 | 0.729                |
| 1311           | 0.582 | 0.582                |
| 1711           | 0.435 | 0.435                |
| 2311           | 0.360 | 0.360                |

### Section S3 Additional and characterizations structural figures

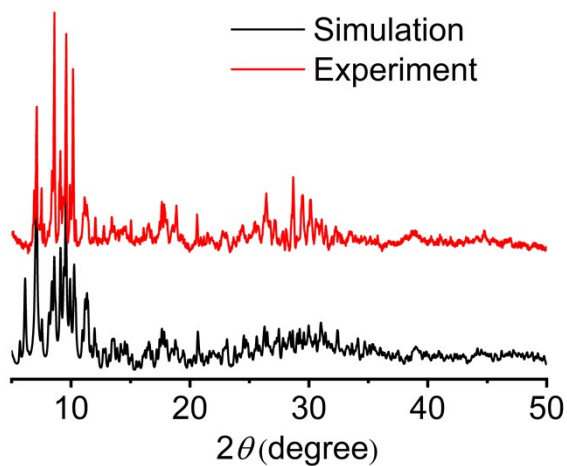

**Figure S1** Experimental and simulated PXRD patterns of **1**.

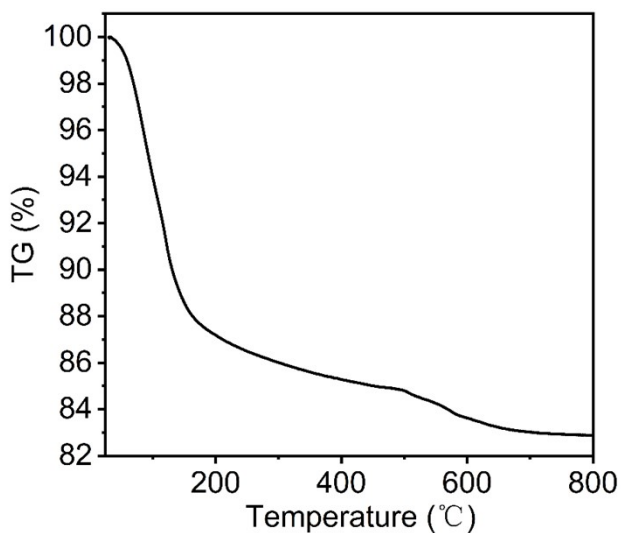

**Figure S2** The TGA curve of **1**

The TGA curve was measured at a heating rate of  $10\text{ }^{\circ}\text{C min}^{-1}$  in a  $\text{N}_2$ -flow atmosphere, and the temperature range of the test was from RT to  $800\text{ }^{\circ}\text{C}$ . The compound has a continuous weight loss process in the temperature range of  $25\text{ }^{\circ}\text{C}$  to  $500\text{ }^{\circ}\text{C}$ . The first weight-loss stage should be ascribed to the loss of lattice water molecules. Based on the first weight-loss of **1**, there are about 112 lattice water molecules.

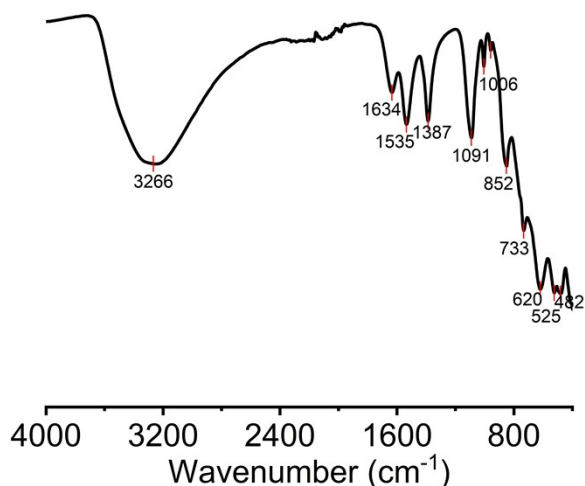

**Figure S3** IR spectrum of **1**.

In the IR spectrum, the broad absorption peak at about  $3266\text{ cm}^{-1}$  is attributed to the  $\nu(\text{O-H})$  stretching vibration of water, and the bending vibration appear at about  $1535\text{ cm}^{-1}$ . The  $\nu(\text{C-O})$  stretching vibrations appear at about  $1387\text{ cm}^{-1}$  and  $1634\text{ cm}^{-1}$ . The  $\nu(\text{P-O})$  stretching vibrations appear at about  $1091\text{ cm}^{-1}$  and  $1006\text{ cm}^{-1}$ . The peak at  $852\text{ cm}^{-1}$  can be attributed to the stretching vibration of  $\nu(\text{Nb-O}_t)$ ,  $733\text{ cm}^{-1}$ ,  $620\text{ cm}^{-1}$  and  $482\text{ cm}^{-1}$  to the stretching vibration of  $\nu(\text{Nb-O}_b\text{-Nb})$ , and the absorption peak near  $525\text{ cm}^{-1}$  to the stretching vibration of  $\nu(\text{Dy-O})$ .

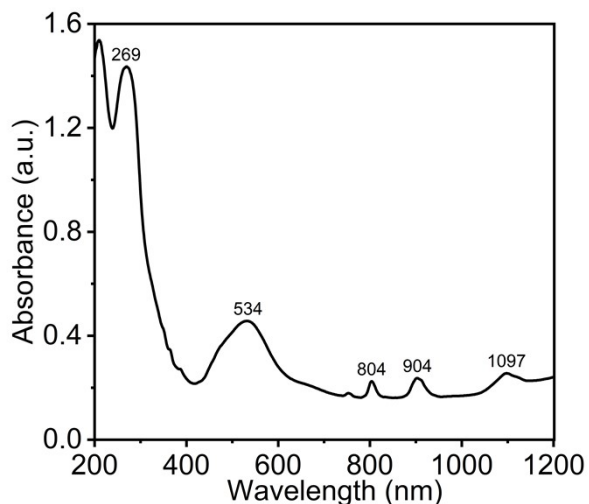

**Figure S4** The solid-state diffuse reflectance UV-vis spectrum of **1**.

The UV diffuse spectrum of compound **1** is determined in the range of 200 to 1200 nm. The absorption peak in the range of 200 to 350 nm can be attributed to the charge transfer transitions from O to Nb. The broad absorption peak in the range of 400 to 600 nm can be attributed to the d-d transition of the 3d transition metal  $\text{Co}^{\text{II}}$ . The three absorption peaks in the range of 700 to 1200 nm can be attributed to the 4f electronic energy level transition of lanthanide  $\text{Dy}^{\text{III}}$ .



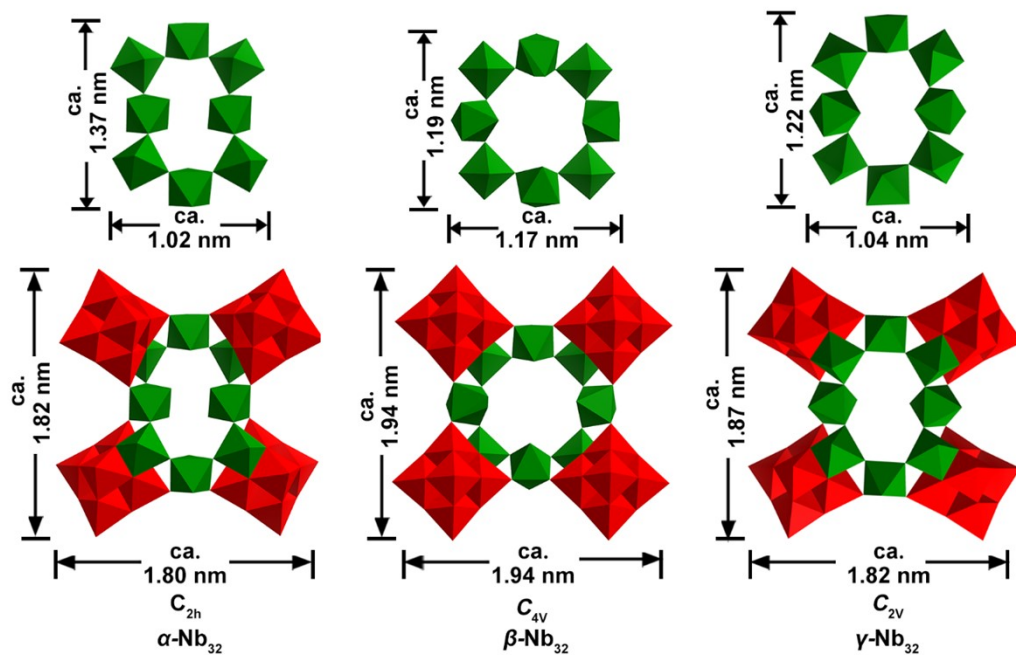

**Figure S5** A structural comparison of 32-nuclear PONb isomers: (a)  $\alpha\text{-Nb}_{32}$ , (b)  $\beta\text{-Nb}_{32}$  and (c)  $\gamma\text{-Nb}_{32}$ ,  $\text{NbO}_6$  octahedra: red/green.

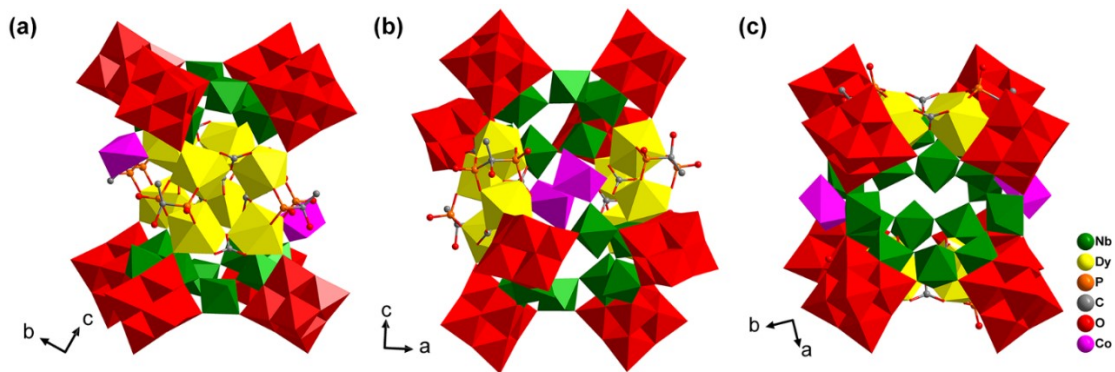

**Figure S6** Diagram of different viewing directions of **1**,  $\text{NbO}_6$  octahedra: red/green.

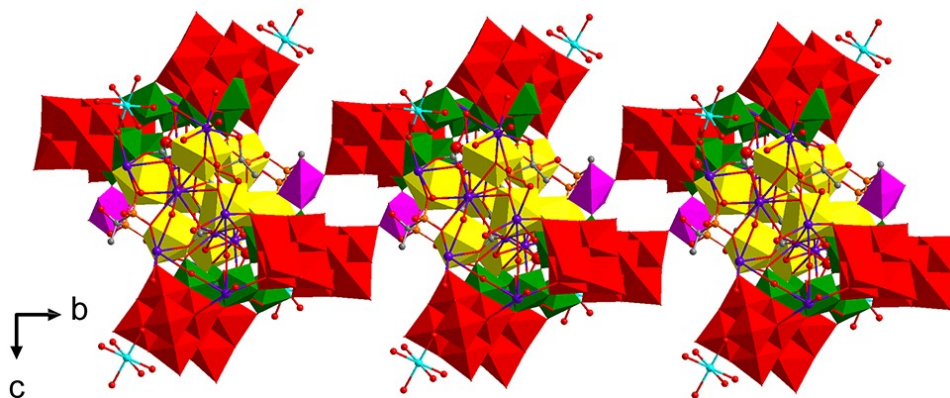

**Figure S7** View of 1D chain of **1** with sodium and potassium ions. NbO<sub>6</sub> octahedra: red/green.

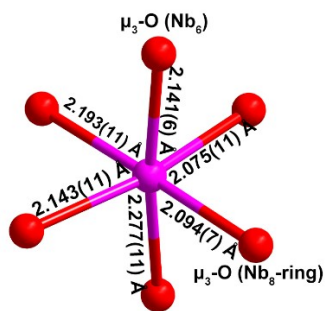

**Figure S8** Coordination pattern for Co. Colour code: O, red; Co, pink.

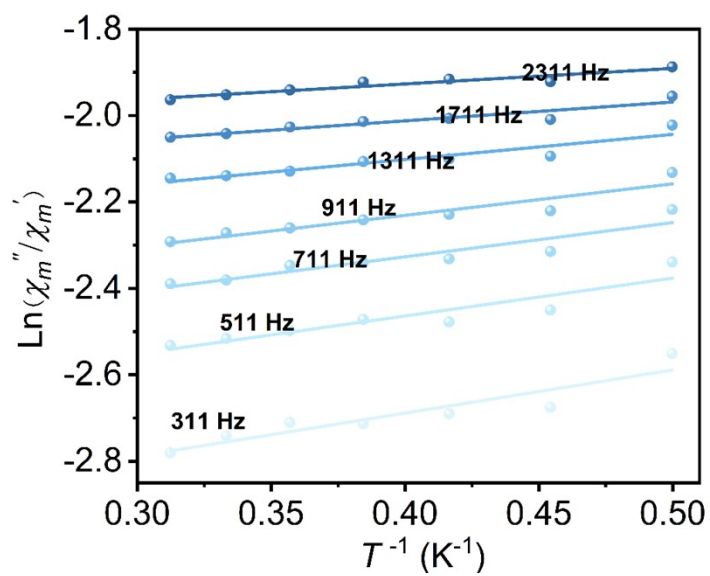

**Figure S9** The calculation of the energy barrier ( $U_{\text{eff}}$ ) of **1**

## References

1. M. Filowitz, R. K. C. Ho, W. G. Klemperer, and W. Shum, *Inorg. Chem.*, 1979, **18**, 93-103.
2. a) A. L. Spek, *J. Appl. Cryst.* 2003, **36**, 7-13; b) P. van der Sluis, A. L. Spek, *Acta Crystallogr., Sect. A*, 1990, **46**, 194-201.
